# Supplementary material
Source: PubMed Central journal article supplement (PMC2767104)
Supplement: NIHMS146665-supplement-Suppl__Figures_1-4.pdf [file NIHMS146665-supplement-Suppl__Figures_1-4.pdf]

# Supplementary Figure 1.

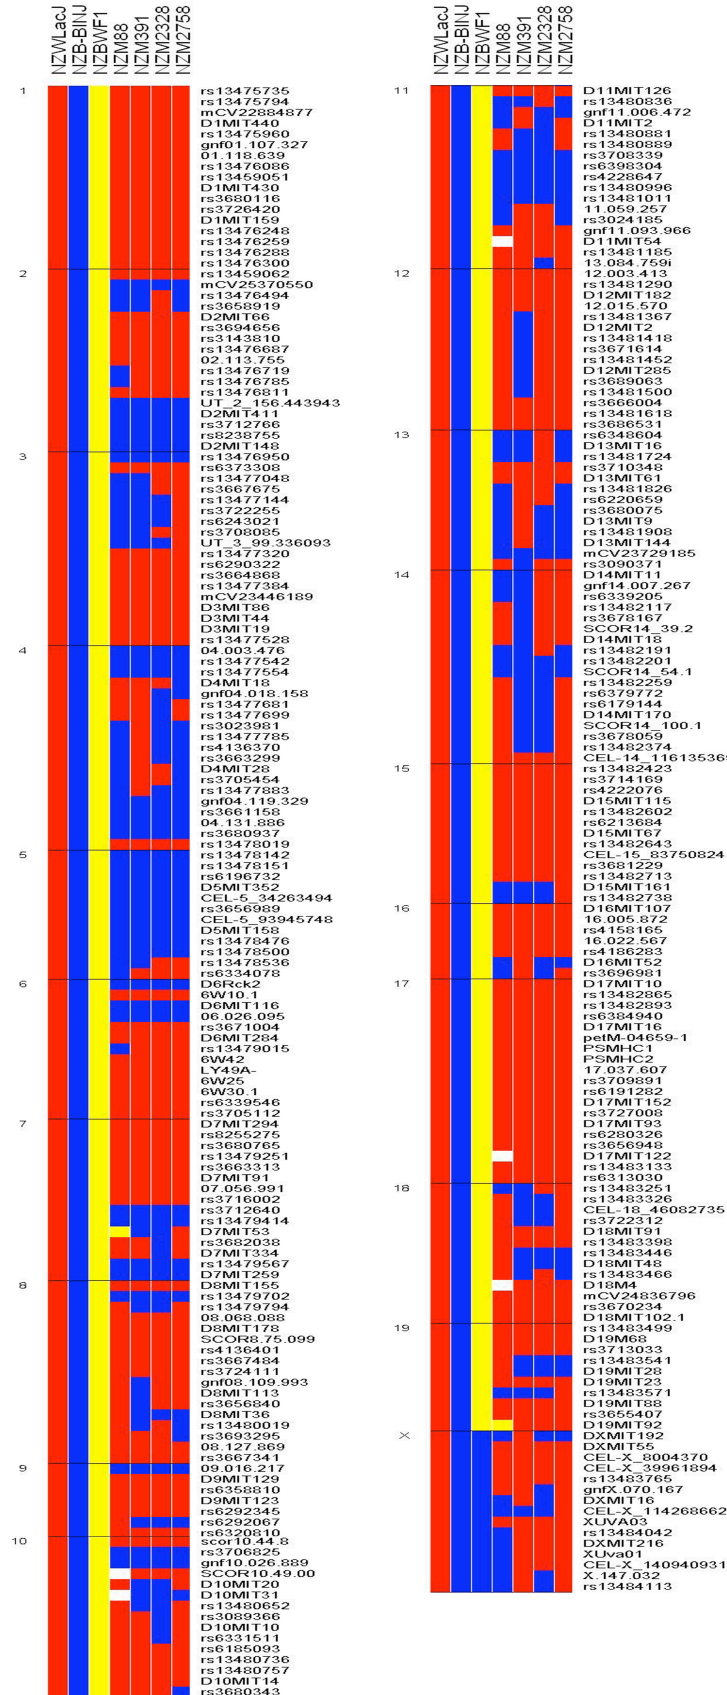

**Supplementary Figure 1. Genome-wide allelic distribution map of the NZM strains.** Genomic DNA from NZW, NZB, WBF<sub>1</sub> and the NZM strains were genotyped with a dense panel of 86 SSLP markers and 196 SNPs. Shown are the NZW (red), NZB (blue), and WBF<sub>1</sub> (yellow) alleles at each genotyped marker (White – genotype not determined). Note that all NZM strains contain NZW alleles on chromosome 17.

## Supplementary Figure 2.

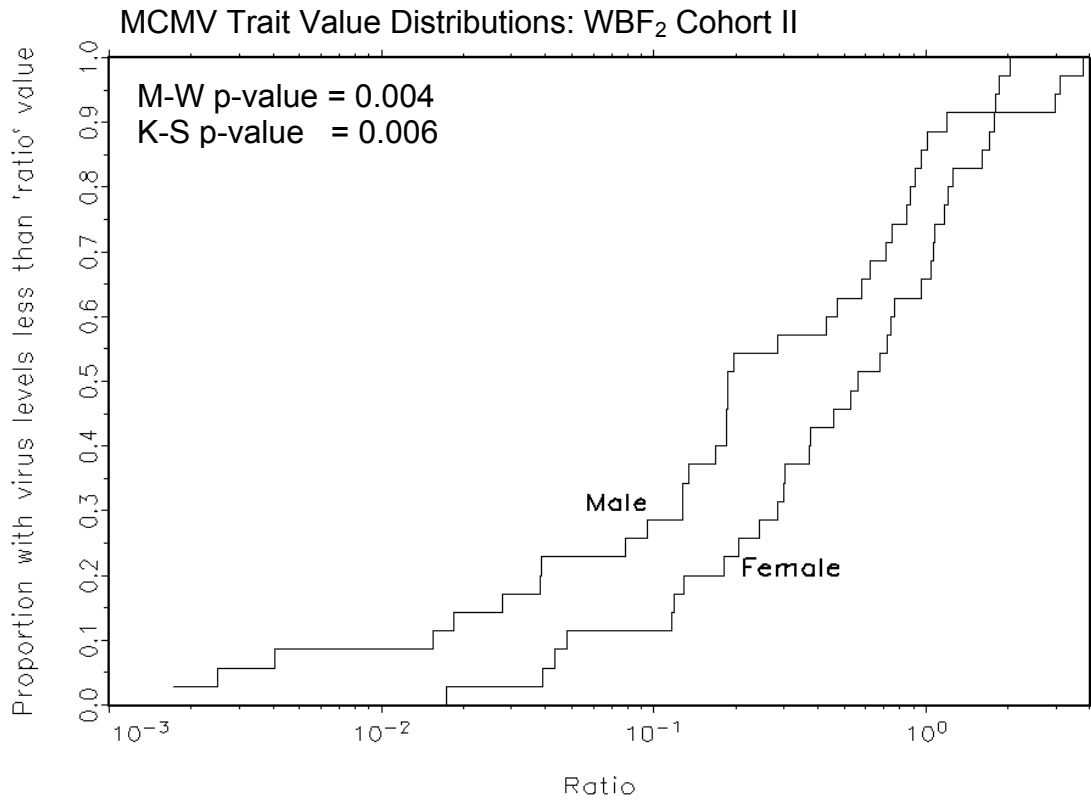

**Supplementary Figure 2. Gender Stratification of WBF<sub>2</sub> Cohort II Animals -**

The proportion of WBF<sub>2</sub> cohort II offspring with less than a given MCMV trait value was plotted. Statistical comparisons for gender-related differences in early MCMV control were performed using the Mann-Whitney, and Kolmogorov-Smirnov. P-values for WBF<sub>2</sub> cohort II are shown.

### Supplementary Figure 3.

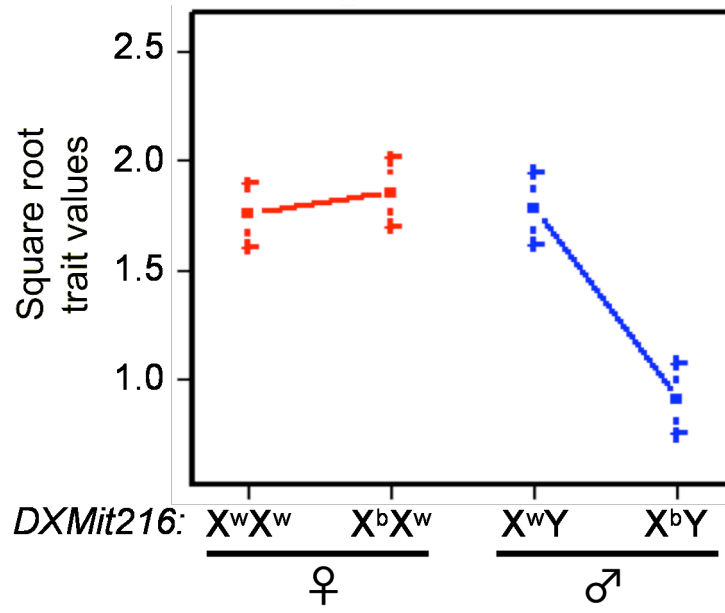

**Supplementary Figure 3. Impact of *DXMit216* on MCMV Trait Values - A**  
*DXMit216* effect plot generated in R/qtl whereby the square root trait values for WBF<sub>2</sub> males and females are stratified by their genotype.



**Supplementary Figure 4. Comparison of MCMV Trait Values in New Zealand F<sub>1</sub> Offspring and NZW.NZB-DXMit216 Congenic Mice – (a)** WBF<sub>1</sub> and BWF<sub>1</sub> mice and NZW controls were i.p. infected with 1 x 10<sup>5</sup> PFU of MCMV (3.5 dpi). QPCR determined spleen (open circles) and liver (closed circles) MCMV levels for individual mice are shown on Log<sub>10</sub> scale. Bars shown represent the arithmetic mean of the Log<sub>10</sub> transformed (CMV/ $\beta$ -actin) copy # ratios. **(b)** B6, NZW, NZB and NZW.NZB-DXMit216 mice were infected i.p. with 1 x 10<sup>5</sup> PFU of MCMV. QPCR determined spleen (open circles) and liver (closed circles) MCMV levels were are shown on a Log<sub>10</sub> scale. Bars shown represent the arithmetic mean of the Log<sub>10</sub> transformed (CMV/b-actin) copy # ratios.
